# THE AMERICAN JOURNAL OF PSYCHIATRY

## EDITOR-IN-CHIEF

Robert Freedman, M.D.

## DEPUTY EDITORS

David A. Lewis, M.D.

Robert Michels, M.D.

Daniel S. Pine, M.D.

Susan K. Schultz, M.D.

Carol A. Tamminga, M.D.

## EDITORIAL STAFF

### Editorial Director

Michael D. Roy

### Senior Editor/Features Writer

Jane Weaver, E.L.S.

### Senior Editors

John J. Guardiano, Ph.D.  
Leannah M. Harding, M.S., E.L.S.

### Production Manager

Julie C. Blair

### Graphic Designer

Steve Hennessey

### Assistant Editor

Angela Moore

### Editorial Support

### Services Manager

Kourtney Skinner

### Editorial Assistant

Samantha Luck

### Administrative Assistant

Victoria Chihos

### Assistants to the Editors

Lois Lilienthal  
Lindsay Karr  
Rachel Hogg  
Russell A. Scholl

## ASSOCIATE EDITORS

Kathleen T. Brady, M.D., Ph.D.

David A. Brent, M.D.

Linda Brzustowicz, M.D.

Cameron S. Carter, M.D.

Howard H. Goldman,  
M.D., Ph.D.

Daniel C. Javitt, M.D.

Bankole Johnson, M.D.

Ellen Leibenluft, M.D.

Jeffrey A. Lieberman, M.D.

Barbara Milrod, M.D.

Maria A. Oquendo, M.D.

Jerrold F. Rosenbaum, M.D.

A. John Rush, M.D.

Larry J. Siever, M.D.

Patricia Suppes, M.D., Ph.D.

Myrna M. Weissman, Ph.D.

## EDITOR EMERITUS

Nancy C. Andreasen,  
M.D., Ph.D.

## FORMER EDITORS

John C. Nemiah, M.D.  
1978-1993

Amariah Brigham, M.D.  
1844-1849

T. Romeyn Beck, M.D.  
1849-1854

John P. Gray, M.D.  
1854-1886

G. Alder Blumer, M.D.  
1886-1894

Richard Dewey, M.D.  
1894-1897

Henry M. Hurd, M.D.  
1897-1904

Edward N. Brush, M.D.  
1904-1931

Clarence B. Farrar, M.D.  
1931-1965

Francis J. Braceland, M.D.  
1965-1978

The American Journal of Psychiatry is online at [ajp.psychiatryonline.org](http://ajp.psychiatryonline.org)

# Read *The American Journal of Psychiatry* Online

Activate your FREE online access—It's as easy as 1, 2, 3!

To begin activation, go to [ajp.psychiatryonline.org](http://ajp.psychiatryonline.org) and click **SUBSCRIBE**

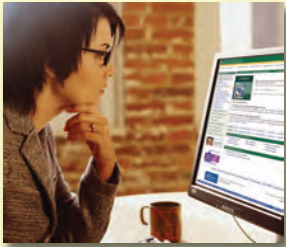

## For APA Members and Other Individuals:

1. Click on **ACTIVATE Your Member or Individual (Non-Member) Subscription**
2. Locate your 10-digit Member/Customer Number\* on your journal mailing label above your name. Be sure to enter all 10 digits, including any leading zeros.
3. Enter your number in the box and click **SUBMIT**.

On the next screen, you'll register your subscription and create a username and password that can be used immediately to access your online subscription.

\*If you are an APA Member, in most cases the number on your label will be your Member Number; if it is not, please enter your APA Member Number (with enough leading zeros to create 10 digits) instead of the number on your mailing label.

## For Institutions:

1. Click on **ACTIVATE Your Institutional Subscription**.
2. Locate your Customer Number on the journal mailing label above your name. Be sure to enter all 10-digits.
3. Enter your number in the box and click **SUBMIT**. On the next screen, you'll have the opportunity to enter IP addresses for your institution to provide seamless access for your patrons.

### Member/Customer Number

AJP3000056866 CAR-RT LOT88 C-015  
John Q. Sample  
Mental Health Professional  
1000 Wilson Blvd STE 1825  
Arlington VA 22209-3924 01654

## Benefits of Online Activation

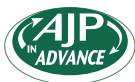

**AJP in Advance**—key research articles posted on the AJP website well in advance of their appearance in print.

**Back issue access to Volume 1, Issue 1**, starting with the *American Journal of Insanity* in 1844. (Available to institutions as a separate one-time purchase.)

**AJP CME**—interactive quizzes that offer *AMA PRA Category 1 Credits*<sup>TM</sup> for selected articles from each issue (with paid subscription to the CME Course Program).

**AJP Audio**—MP3-format program summarizing findings from key articles from each issue.

**Residents' Journal**—the gateway to AJP articles and features that have most value to residents in their training.

**Precise and powerful searching** by author, keyword, and/or citation details—within any one journal, across the entire PsychiatryOnline journal collection, or across all HighWire journals.

**PubMed, CrossRef, and Google Scholar links**—from cited references to abstracts and full text; to similar articles; to other articles by the same lead authors.

**eTOCs**—Get advance email alerts with the table of contents from the latest issue.

For more information or if you cannot locate your customer number, please contact APPI Customer Service:  
Call: 1.800.368.5777 or 703.907.7322  
Email: [appi@psych.org](mailto:appi@psych.org)

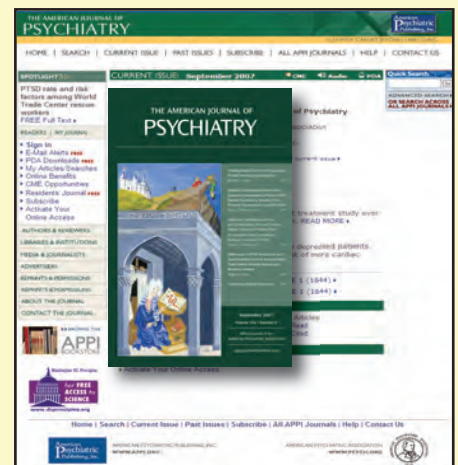

American  
**Psychiatric**  
Publishing, Inc.

The First and Last Word in Psychiatry

AH810

# The Residents' JOURNAL

Last Issue's

## Table of Contents

- 2 Residents in Psychotherapy: Where Have All the Hours Gone?  
Paul P. Christopher, M.D.
- 3 The Making of A Good Therapist: One Resident's Perspective  
Amy Yang, M.D.
- 4 Manifest Similarities: More Than Skin Deep  
C. Joy Somberg, M.D.
- 6 Committee of Residents and Fellows

The Residents' Journal is sent free-of-charge to all psychiatry residents. Anyone interested in being included on the distribution list should contact Angela Moore, the Residents' Journal staff editor at [ajp@psych.org](mailto:ajp@psych.org) with "Subscribe to Residents' Journal" in the subject line.

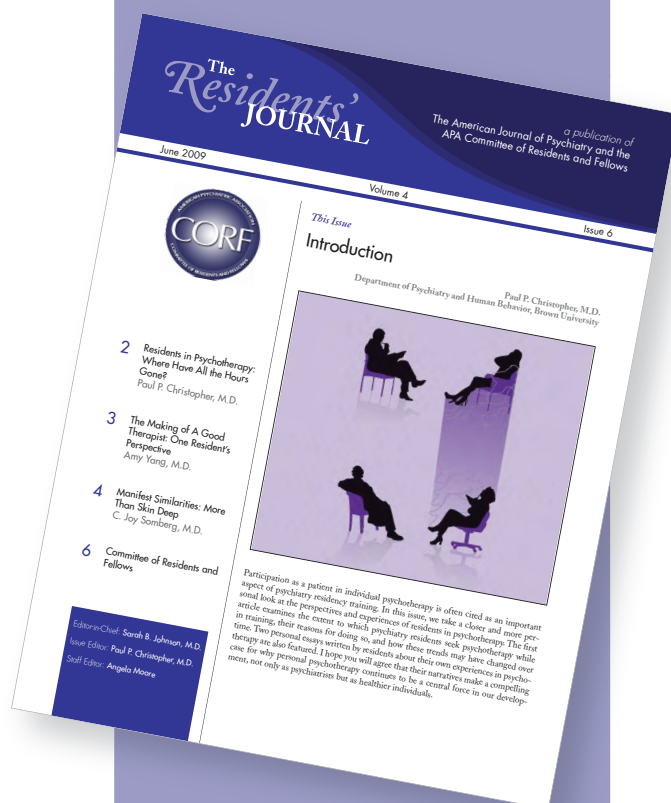

a publication of  
The American Journal of Psychiatry and the  
APA Committee of Residents and Fellows

# THE AMERICAN PSYCHIATRIC ASSOCIATION

1000 Wilson Blvd., Suite 1825, Arlington, VA 22209-3901  
(888) 357-7924 (toll-free inside the U.S. and Canada) / (703) 907-7300  
web site: [www.psych.org/](http://www.psych.org/) e-mail: [apa@psych.org](mailto:apa@psych.org)

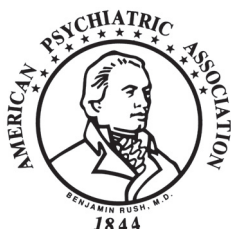

## OFFICERS 2009–2010

|                     |                                 |
|---------------------|---------------------------------|
| President           | Alan F. Schatzberg, M.D.        |
| President-Elect     | Carol A. Bernstein, M.D.        |
| Vice-President      | Jeffrey L. Geller, M.D., M.P.H. |
| Secretary-Treasurer | David Fassler, M.D.             |

## ASSEMBLY

|               |                           |
|---------------|---------------------------|
| Speaker       | Gary S Weinstein, M.D.    |
| Speaker-Elect | Bruce A. Hershfield, M.D. |
| Recorder      | Ann Marie Sullivan, M.D.  |

## MEDICAL DIRECTOR'S OFFICE

|                                                                        |                                |
|------------------------------------------------------------------------|--------------------------------|
| Medical Director<br>and CEO                                            | James H. Scully, Jr., M.D.     |
| Chief Executive<br>Officer, American<br>Psychiatric<br>Publishing, Inc | Ronald E. McMillen             |
| Executive Director,<br>APIRE,<br>Division of Research                  | Darrel A. Reiger, M.D., M.P.H. |
| Executive Director,<br>American Psychiatric<br>Foundation              | Paul T. Burke                  |

## BOARD OF TRUSTEES

|                           |                                  |
|---------------------------|----------------------------------|
| Becky Bay, M.D.           | Carolyn B. Robinowitz, M.D.      |
| Thomas K. Ciesla, M.D.    | Pedro Ruiz, M.D.                 |
| Mary Helen Davis, M.D.    | Jacqueline N. Smith, M.D.        |
| Melinda G. Fierros, M.D.  | Joyce A. Spurgeon, M.D.          |
| Dilip V. Jeste, M.D.      | Frederick J. Stoddard, Jr., M.D. |
| James E. Nininger, M.D.   | Nada L. Stotland, M.D., M.P.H.   |
| Roger Peele, M.D.         | John Chapman Urbaitis, M.D.      |
| Kayla M. Pope, M.D., J.D. | John J. Wernert III, M.D.        |
|                           | William M. Womack, M.D.          |

## AMERICAN PSYCHIATRIC PUBLISHING, INC

### BOARD OF DIRECTORS

|                          |                                         |
|--------------------------|-----------------------------------------|
| President and Chair      | Laura Weiss Roberts, M.D.               |
| Secretary                | Donna M. Norris, M.D.                   |
| Treasurer                | Joan A. Lang, M.D.                      |
| John M. Oldham,<br>M.D.  | Pedro Ruiz, M.D.                        |
|                          | Donna E. Stewart, M.D.,<br>F.R.C.P.(C.) |
| Katharine Phillips, M.D. |                                         |
|                          | Amy Ursano, M.D.                        |

### EX-OFFICIO MEMBERS

|                                                           |                               |
|-----------------------------------------------------------|-------------------------------|
| APA President                                             | Alan F. Schatzberg, M.D.      |
| APA President-Elect                                       | Carol A. Bernstein, M.D.      |
| APA Secretary-<br>Treasurer                               | David Fassler, M.D.           |
| APA Medical Director<br>and CEO                           | James H. Scully, Jr., M.D.    |
| Editor-in-Chief,<br>The American Journal<br>of Psychiatry | Robert Freedman, M.D.         |
| Editor-in-Chief, Books                                    | Robert E. Hales, M.D., M.B.A. |

The American Journal of Psychiatry is online at [ajp.psychiatryonline.org](http://ajp.psychiatryonline.org)



# get CME from AJP

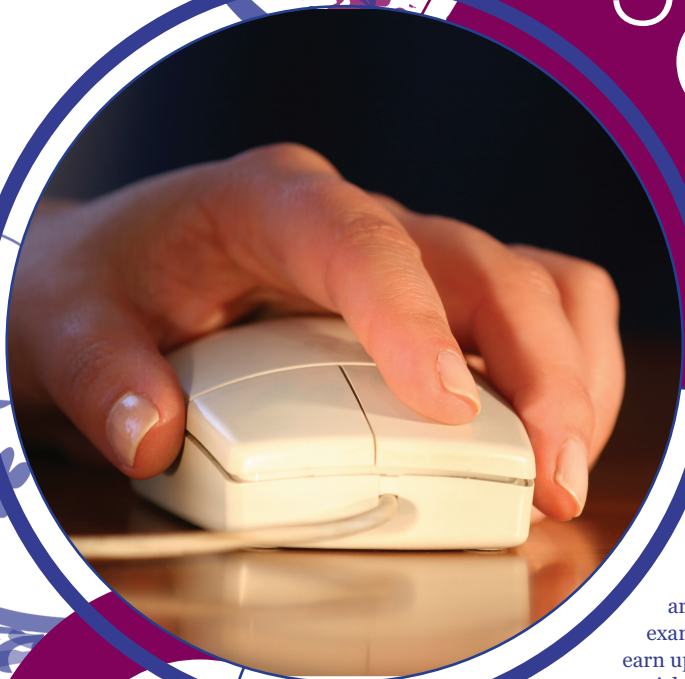

Brief companion exams are created for three of the most influential articles from each issue. By reading the articles and completing the online exams, you can test your knowledge and earn up to 1 AMA PRA Category 1 Credits™ per article. Correct answers are highlighted for your reference upon completion of the course; there is no minimum threshold score necessary for the credit. A link from the question to the correct answer in context will also be highlighted in the associated article, thus extending the learning experience.

CME credit is only provided online, and a subscription to the AJP CME program is required. From the moment you subscribe to the AJP CME program, you will be able to select from 72 courses from among 40 possible subject areas. You'll also be able to access the next 33 courses as they become available. For more information and pricing, please go to <http://cme.psychiatryonline.org/misc/aboutajpcme.shtml>

This activity is sponsored by the American Psychiatric Association. The American Psychiatric Association is accredited by the Accreditation Council for Continuing Medical Education to provide continuing medical education for physicians. The American Psychiatric Association designates this educational activity for a maximum of 1 AMA PRA Category 1 Credits™. Physicians should only claim credit commensurate with the extent of their participation in the activity.

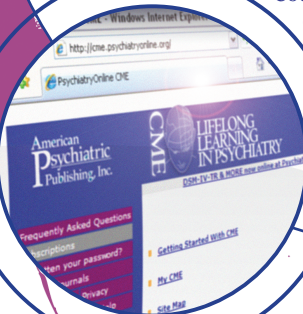

Fulfill your CME requirement while staying current on the latest advances in psychiatry.  
Subscribe to AJP CME!
