# THE AMERICAN JOURNAL OF PSYCHIATRY

---

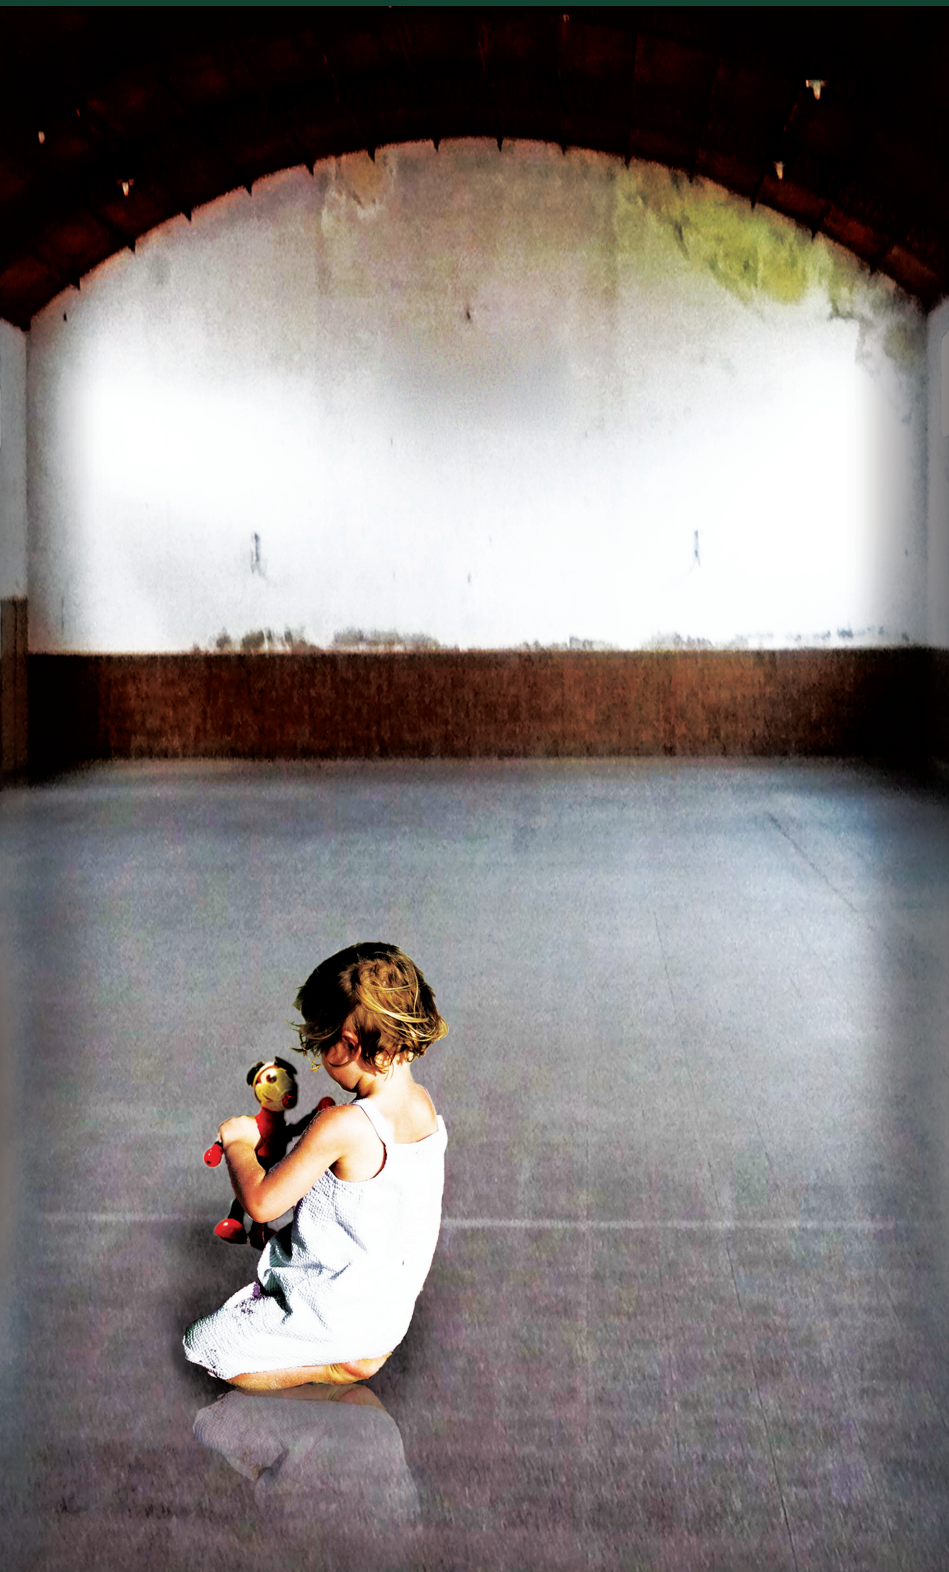

- ◀ **Institutional Rearing and Psychiatric Disorders in Romanian Preschool Children**  
Charles H. Zeanah, M.D., et al. 777
- The Incidence and Course of Depression in Bereaved Youth 21 Months After the Loss of a Parent to Suicide, Accident, or Sudden Natural Death**  
David Brent, M.D., et al. 786
- Four-Year Longitudinal Course of Children and Adolescents With Bipolar Spectrum Disorders: The Course and Outcome of Bipolar Youth (COBY) Study**  
Boris Birmaher, M.D., et al. 795
- Using Neuroplasticity-Based Auditory Training to Improve Verbal Memory in Schizophrenia**  
Melissa Fisher, Ph.D., et al. 805
- Continuing Medical Education** 837

**July 2009**

**Volume 166 • Number 7**

---

Official Journal of the  
AMERICAN PSYCHIATRIC ASSOCIATION

---

[ajp.psychiatryonline.org](http://ajp.psychiatryonline.org)
